# Supplementary material for: Identifying promoter features of co-regulated genes with similar network motifs
Source: PubMed Central journal article supplement (PMC2681069; doi:10.1186/1471-2105-10-s4-s1), 2009-04-29
Supplement: 1471-2105-10-S4-S1-S1.pdf [file 1471-2105-10-S4-S1-S1.pdf]

# Identifying promoter features of co-regulated genes with similar network motifs

## Supplemental Text

### Fuzzy sets and logic expressions

Fuzzy logic expression incorporate predicates having fuzzy variables, which are manipulated using various theorems/axioms and methods [1]. These expressions have been widely applied to model relational clusters or features [1, 2]. Given a dataset

$X = \{x_1, \dots, x_n\}$ , the feature that characterizes it can be best described as a set

$F_1(X) = \{d_{11} / x_1, \dots, d_{1n} / x_n\}$ , where  $\{d_{11}, \dots, d_{1n}\} \in \{0,1\}$  in classical set theory and  $[0,1]$  in

fuzzy set theory. These fuzzy values represent the degree of matching between an

observation of the dataset and a fuzzy set defined using triangular functions [1]:

$$\mu(x) = \begin{cases} 0 & \text{if } x < a_0 \text{ or } x > a_2 \\ (x - a_0)/(a_1 - a_0) & \text{if } x < a_1 \\ (a_2 - x)/(a_2 - a_1) & \text{if } x > a_1 \\ 1 & \text{otherwise} \end{cases} \quad (1)$$

where  $a_0, \dots, a_2$  are learned from the projection of the histograms onto the variable domains by simple regression and minimum squared methods [3, 4]. This process is analogous to fitting histograms to a distribution, and assigning probability values based on a density function. Our approach, however, adopts a distribution-independent and non-parametric fitting process by projecting data [3, 4] into triangular functions. The degree of matching is defined in the unit interval and can be obtained from evaluating the membership function of the corresponding fuzzy set. Then, given

$F_2(X) = \{d_{21} / x_1, \dots, d_{2n} / x_n\}$  and the Minimum as a T-norm (intersection) operator:

$$F_1(X) \text{ AND } F_2(X) = F_1 \cap F_2 = \text{MIN}(F_1, F_2) = \{\text{MIN}(d_{11}, d_{21})/x_1, \dots, \text{MIN}(d_{1n}, d_{2n})/x_n\}$$

Combination of several expressions is performed by using the Maximum as a T-conorm (union) operator.

### Fuzzy C-Means clustering method

This method [5, 6] is an extension of the  $K$ -means clustering method, where the elements can belong to more than one cluster with a different degree of membership. Thus, membership of a promoter  $k$  with a feature value  $x_k$  in a particular cluster  $V_i$  is calculated as:

$$\mu_{i,k} = \left[ 1 + \left( \|x_k - \bar{V}_i\|_A^2 / w_i \right)^{1/m-1} \right]^{-1} \quad \forall i, k; 1 < m \leq \infty \quad (2)$$

where  $c$ -partitions of the data  $X$  were usually arrayed as a  $(c \times n)$  matrix  $U$  containing the vector representation of matching between  $n$  promoters and  $c$ -partitions of one type of feature,  $\mu_{i,k}$  is taken as the degree of membership of the value  $x_k$  in the  $i$ th partitioning fuzzy subset of  $X$ ,  $\bar{V}_i$  is the cluster prototype or centroid of partition  $V_i$ ,  $m$  is the degree of fuzzification,  $A$  determines the type of norm commonly used in pattern recognition (e.g.,  $A=1$  is the city block norm;  $A=2$  is the Euclidean norm, etc [2]), and a weight for penalty terms  $w_i$ , which is initialized as 1 in the absence of external information. If the approach is probabilistic  $\mu_{i,k}$  is usually the posterior probability  $p(i/x_k)$  that, given  $x_k$ , it comes from class  $i$  by following Bayes' rule [2, 6, 7]. If the approach is fuzzy,  $x_k$  can come from more than one class, and if it is possibilistic [2], a more realistic situation is

represented where we do not force each element to belong to a class. The cluster prototype or centroid of partition  $V_i$  is calculated as:

$$V_i = \frac{\sum_{k=1}^n (\mu_{i,k})^m x_k}{\sum_{k=1}^n (\mu_{i,k})^m} \quad \forall i \quad (3)$$

based on the use of the Euclidean distance as a similarity function:

$$\|x, V\|_2 = \sqrt{(x - V)^T (x - V)} \quad (4)$$

Summarizing, (0) Initialize  $V_0 = \{v_1, \dots, v_c\}$  (1) While ( $t < T$  and  $\|V_t - V_{t-1}\| > \epsilon$ ) (2)

Calculate  $U_t$  with  $V_{t-1}$ , (3) update  $V_{t-1}$  to  $V_t$ , with  $U_t$  (4) Iterate, where T is the

maximum number of iterations. The minimization of this index [2] through different

number of clusters (i.e.,  $c = 2$  to  $c = \sqrt{n}$ ) detects compact representations of Fuzzy C-

Means partitions:

$$XB(U, L) = \frac{\sum_{k=1}^n \sum_{i=1}^c u_{i,k}^2 \|x_k - \bar{V}_i\|^2}{n \left( \min_{i \neq j} \left\{ \|\bar{V}_i - \bar{V}_j\|^2 \right\} \right)} \quad (4)$$

### Performance Measurement

We use a correlation coefficient implementation to establish best local thresholds for transcription factor binding site motifs. That is, from a range of possible thresholds applied over a particular motif, we choose the one that maximizes this coefficient defined

as:  $CC = (TP \times TN) - (FP \times FN) / \sqrt{(TP + FP) \times (TN + FN) \times (TP + FN) \times (TN + FP)}$ ,

where specificity =  $TN / (TN + FP)$  and sensitivity =  $TP / (TP + FN)$ ; P= positive,

N=negative, T = true and F=false [8]. We constrained the sensitivity of the selected

threshold to be above the 60%. The false positive rate for binding site analysis was

calculated by detecting binding sites from other transcription factors different from the one being evaluated (RegulonDB database).

## References

1. Klir GJ, Folger TA: **Fuzzy sets, uncertainty, and information**. London: Prentice Hall International; 1988.
2. Bezdek JC: **Pattern Analysis**. In: *Handbook of Fuzzy Computation*. Edited by Pedrycz W, Bonissone PP, Ruspini EH. Bristol: Institute of Physics; 1998: F6.1.1-F6.6.20.
3. Everitt B, Der G: **A handbook of statistical analysis using SAS**. London: Chapman & Hall; 1996.
4. Sugeno M, Yasukama T: **A Fuzzy-logic-based Approach to Qualitative Modeling**. *IEEE Transactions on Fuzzy Systems* 1993, 1(1):7-31.
5. Gasch AP, Eisen MB: **Exploring the conditional coregulation of yeast gene expression through fuzzy k-means clustering**. *Genome Biol* 2002, 3(11):RESEARCH0059.
6. Bezdek JC, Pal SK, IEEE Neural Networks Council: **Fuzzy models for pattern recognition : methods that search for structures in data**. New York: IEEE Press; 1992.
7. Mitchell TM: **Machine learning**. New York: McGraw-Hill; 1997.
8. Benitez-Bellon E, Moreno-Hagelsieb G, Collado-Vides J: **Evaluation of thresholds for the detection of binding sites for regulatory proteins in Escherichia coli K12 DNA**. *Genome Biol* 2002, 3(3):RESEARCH0013.

## Supplemental Tables

**Table S1:** Features describing PhoP regulated promoters and raw data used to build them.

| Gene   | Code | Genome     | Philo   | geny  | Identity | PhoP-Box pattern |       |       |                          | Sequence | Orientation |          |
|--------|------|------------|---------|-------|----------|------------------|-------|-------|--------------------------|----------|-------------|----------|
|        |      |            |         |       |          | M1               | M2    | M3    | M4                       |          | Direct      | Opposite |
|        |      |            |         |       |          | O1               | O2    |       |                          |          |             |          |
| b2833  | 73   | E. coli    | ygdR    | 90.28 | 0.788    | 0.639            | 0.578 | 0.422 | AGATATATAACGTCGGTTTATAA  | 1        | 0           |          |
| b1825  | 6    | E. coli    | STM1839 | 63.16 | 0.914    | 0.699            | 0.608 | 0.000 | ACATAGTTAGGCGCTGTTTAACT  | 1        | 0           |          |
| b1826  | 28   | E. coli    | yobG    | 65.96 | 0.914    | 0.699            | 0.608 | 0.000 | ACATAGTTAGGCGCTGTTTAACT  | 1        | 0           |          |
| nmpC   | 221  | E. coli    | nmpC    | 81.71 | 0.809    | 0.521            | 0.586 | 0.422 | TGTTATTTTTAGCCGGTTTAAAT  | 1        | 0           |          |
| slyB   | 351  | E. coli    | slyB    | 61.94 | 0.791    | 0.428            | 0.586 | 0.195 | TGGTATTCACGAAAAGTTTATGT  | 0        | 1           |          |
| ompT   | 230  | E. coli    | pgtE    | 46.56 | 0.921    | 0.441            | 0.566 | 0.000 | ACATATTGCTCCACTGTTTATAT  | 0        | 1           |          |
| ybjX   | 358  | E. coli    | ybjX    | 55.56 | 0.784    | 0.000            | 0.433 | 0.000 | TGATATTTTCGTTGAAGTTAATGA | 0        | 1           |          |
| ybjX   | 360  | E. coli    | ybjX    | 55.56 | 0.910    | 0.499            | 0.433 | 0.556 | CACTATTGATGTTTGGTTAAGAT  | 1        | 0           |          |
| yhiE   | 606  | E. coli    | no      | 0.00  | 0.778    | 0.518            | 0.000 | 0.313 | TGCTATTTACAAGCTGATAACAA  | 1        | 0           |          |
| ompT   | 226  | E. coli    | pgtE    | 46.56 | 0.701    | 0.990            | 1.000 | 0.894 | CACTGTTTATATTTTGTTTAGTA  | 0        | 1           |          |
| yrbL   | 929  | E. coli    | yrbL    | 72.38 | 0.701    | 0.990            | 1.000 | 0.894 | CATGTTTTAGGTTTTGTTAAGT   | 1        | 0           |          |
| ybcU   | 357  | E. coli    | no      | 0.00  | 0.701    | 0.990            | 1.000 | 0.894 | CATGTTTTAGGGTTTGTTTAATT  | 1        | 0           |          |
| pagC   | 1026 | Salmonella | ompX    | 38.79 | 0.000    | 0.885            | 0.855 | 0.589 | TATTATTTACGGTGTGTTTAAAC  | 0        | 1           |          |
| rstA   | 349  | Salmonella | rstA    | 80.75 | 0.000    | 0.754            | 0.702 | 0.589 | TCTCGTTTAGAAAAGATTTATGG  | 1        | 0           |          |
| ybjX   | 438  | Salmonella | ybjX    | 57.14 | 0.661    | 0.930            | 1.000 | 0.853 | GTTTGTTTAGATACGGTTTACTT  | 0        | 1           |          |
| udg    | 729  | Salmonella | udg     | 88.92 | 0.661    | 0.930            | 1.000 | 0.853 | AAATGTTTAAGCCCGTTTAATA   | 1        | 0           |          |
| mig-14 | 568  | Salmonella | nothing | 0.00  | 0.530    | 0.804            | 0.980 | 0.780 | AAATGTTTAGCTTGTATTTAATG  | 0        | 1           |          |
| pagC   | 1027 | Salmonella | ompX    | 38.79 | 0.000    | 0.642            | 0.980 | 0.647 | CTGTGTTTAGAGAGAATTTACAT  | 0        | 1           |          |
| pagD   | 704  | Salmonella | nothing | 0.00  | 0.000    | 0.642            | 0.980 | 0.647 | CTGTGTTTAGAGAGAATTTACAT  | 1        | 0           |          |
| rstA   | 330  | E. coli    | rstA    | 80.75 | 0.000    | 0.550            | 0.805 | 0.569 | ACCTGATGAAAAC TTGTTTAGAA | 1        | 0           |          |
| mgtC   | 623  | Salmonella | yhiD    | 32.21 | 0.000    | 0.630            | 0.906 | 0.574 | TCATGTTTAAACACGCTTTATTT  | 1        | 0           |          |
| pmrD   | 513  | Salmonella | pmrD    | 59.49 | 0.921    | 0.441            | 0.566 | 0.277 | CGCTATTGCCGTTTTGTTTATCC  | 1        | 0           |          |
| yrbL   | 943  | Salmonella | yrbL    | 72.38 | 0.000    | 1.000            | 0.723 | 0.743 | TTTCGTTTAGGTTTTGTTAAGT   | 1        | 0           |          |
| phoP   | 277  | E. coli    | phoP    | 89.69 | 0.000    | 0.977            | 0.723 | 0.835 | GCTGGTTTATTTAATGTTTACCC  | 1        | 0           |          |
| phoP   | 604  | Salmonella | phoP    | 89.69 | 0.000    | 0.977            | 0.723 | 0.835 | TCTGGTTTATTAAGCTGTTTATCC | 1        | 0           |          |
| mgtA   | 599  | Salmonella | mgtA    | 86.54 | 0.000    | 0.918            | 0.723 | 0.795 | TCTGGTTTATCGTTGGTTAATT   | 1        | 0           |          |
| mgtA   | 149  | E. coli    | mgtA    | 87.61 | 0.000    | 0.918            | 0.723 | 0.795 | TCTGGTTTATCGTTGGTTTAGTT  | 1        | 0           |          |
| pmrD   | 125  | E. coli    | pmrD    | 60.00 | 0.000    | 0.699            | 0.578 | 0.590 | TGCCGTTGATAAAGAGTTTATCT  | 1        | 0           |          |
| yhiW   | 743  | E. coli    | adiY    | 40.16 | 0.000    | 0.814            | 0.445 | 0.616 | CAGCGTATAGCTTATGTTTATAA  | 0        | 1           |          |
| yhiW   | 646  | E. coli    | adiY    | 40.16 | 0.000    | 0.814            | 0.445 | 0.616 | CAGCGTATAGCTTATGTTTATAA  | 0        | 1           |          |
| ybjX   | 417  | Salmonella | ybjX    | 57.14 | 0.000    | 0.796            | 0.454 | 0.531 | TACGGTTTACTTTCTGGTTAAAA  | 0        | 1           |          |
| virK   | 642  | Salmonella | ybjX    | 39.08 | 0.701    | 0.755            | 0.433 | 0.419 | CGCCATTGATAAACTGTTTAAACA | 1        | 0           |          |
| pagP   | 602  | Salmonella | crcA    | 73.68 | 0.000    | 0.804            | 0.723 | 0.922 | CTCTGTTTATAGTTTGTTAAGAT  | 1        | 0           |          |
| ybjX   | 402  | Salmonella | ybjX    | 57.14 | 0.910    | 0.499            | 0.433 | 0.556 | CTGTATTGACGATTGGTTAATGT  | 1        | 0           |          |
| ugtL   | 883  | Salmonella | nothing | 0.00  | 0.000    | 0.651            | 0.557 | 0.701 | CACGGTTGAGCAACTATTTACTT  | 0        | 1           |          |
| slyB   | 352  | Salmonella | slyB    | 70.32 | 0.000    | 0.754            | 0.445 | 0.731 | CTTCGTTTAAAGATTGGTTAATTA | 1        | 0           |          |
| nmpC   | 224  | Salmonella | nmpC    | 81.82 | 0.000    | 0.640            | 0.445 | 0.810 | CCTCGTTTAAACAATGGTTGAGGA | 1        | 0           |          |
| hdeA   | 137  | E. coli    | no      | 0.00  | 0.000    | 0.504            | 0.445 | 0.873 | TTCTGTATATGTCATGTTGATGG  | 0        | 1           |          |
| hdeD   | 146  | E. coli    | no      | 0.00  | 0.000    | 0.504            | 0.445 | 0.873 | TTCTGTATATGTCATGTTGATGG  | 1        | 0           |          |

**PhoP-Box pattern**

**Orientation**  
**Direct** **Opposite**  
**O1** **O2**

| Gene   | Code | Genome     | PhiloGeny | Identity | M1    | M2    | M3    | M4    | Sequence                  | O1 | O2 |
|--------|------|------------|-----------|----------|-------|-------|-------|-------|---------------------------|----|----|
| hilA   | 822  | Salmonella | ygeH      | 29.03    | 0.000 | 0.491 | 0.352 | 0.749 | TCGGGTTTATATGTTTTAACAT    | 0  | 1  |
| slyB   | 350  | E. coli    | slyB      | 61.94    | 0.519 | 0.630 | 0.723 | 0.960 | TTTTGTTTATAATTGGTTGATCC   | 1  | 0  |
| ybjX   | 359  | E. coli    | ybjX      | 55.56    | 0.000 | 0.274 | 0.381 | 0.891 | TTTTGTTGATATTTCGTTGAAGT   | 0  | 1  |
| rstA   | 339  | E. coli    | rstA      | 80.75    | 0.000 | 0.444 | 0.702 | 0.846 | ACTTGTTTGTAGAAACGATTGATAG | 1  | 0  |
| virK   | 643  | Salmonella | ybjX      | 39.08    | 0.000 | 0.384 | 0.586 | 0.613 | CGATGTTGTAAACAGTTTATCA    | 0  | 1  |
| mgtC   | 681  | Salmonella | yhiD      | 32.21    | 0.000 | 0.330 | 0.629 | 0.846 | TTCTGTTTAAAGTTGTTTGATAT   | 0  | 1  |
| pipD   | 847  | Salmonella | nothing   | 0.00     | 0.687 | 0.259 | 0.412 | 0.561 | CTTTATTGAGGTTGTATTGATAA   | 0  | 1  |
| pgtE   | 720  | Salmonella | ompT      | 46.56    | 0.000 | 0.394 | 0.805 | 0.286 | TCATGATTATAGATTGCTTATTA   | 1  | 0  |
| mgtC   | 925  | Salmonella | yhiD      | 32.21    | 0.000 | 0.000 | 0.761 | 0.355 | TAATGTTTCCTTATATTTTAAAT   | 1  | 0  |
| yeaF   | 469  | E. coli    | mipA      | 83.87    | 0.000 | 0.000 | 0.785 | 0.000 | CATTAATTATGCAAAATTTATGG   | 0  | 1  |
| trs5_8 | 354  | E. coli    | no        | 0.00     | 0.701 | 0.817 | 0.732 | 0.589 | CAGTTTTTAAAACTGTTTAAAG    | 0  | 1  |
| yeaF   | 464  | E. coli    | mipA      | 83.87    | 0.530 | 0.808 | 0.732 | 0.589 | ATTTGTTTAAAGGAATGATTAATT  | 1  | 0  |
| mgtC   | 718  | Salmonella | yhiD      | 32.21    | 0.914 | 0.559 | 0.463 | 0.000 | GTTTAGTGACGTTCTGTTTAAAGT  | 0  | 1  |
| yobG   | 861  | Salmonella | b1826     | 65.96    | 0.575 | 0.650 | 0.331 | 0.000 | CTACAGTTACTCCTGGTTTAAAGT  | 1  | 0  |
| yaG    | 753  | E. coli    | yaG       | 79.17    | 0.501 | 0.360 | 0.000 | 0.773 | ATTTGTTGTTTCATTGTTAAAAA   | 1  | 0  |
| ompX   | 242  | E. coli    | ompX      | 83.63    | 0.000 | 0.537 | 0.000 | 0.921 | GCTGGTTGAGCATTGTTGAAAA    | 1  | 0  |
| ompX   | 248  | Salmonella | ompX      | 77.78    | 0.000 | 0.262 | 0.000 | 0.833 | GGCGGTTGAGGGTTTCGTTGAAAA  | 1  | 0  |
| yhdG   | 546  | E. coli    | yhdG      | 96.26    | 0.000 | 0.000 | 0.000 | 0.000 |                           | 0  | 0  |
| yaiN   | 356  | E. coli    | STM1628   | 52.75    | 0.000 | 0.000 | 0.000 | 0.000 |                           | 0  | 0  |
| pyrI   | 286  | E. coli    | pyrI      | 94.12    | 0.000 | 0.000 | 0.000 | 0.000 |                           | 0  | 0  |
| ygiW   | 512  | E. coli    | ygiW      | 89.23    | 0.000 | 0.000 | 0.000 | 0.000 |                           | 0  | 0  |
| gadB   | 78   | E. coli    | no        | 0.00     | 0.000 | 0.000 | 0.000 | 0.000 |                           | 0  | 0  |
| gadA   | 77   | E. coli    | no        | 0.00     | 0.000 | 0.000 | 0.000 | 0.000 |                           | 0  | 0  |
| dps    | 75   | E. coli    | dps       | 95.21    | 0.000 | 0.000 | 0.000 | 0.000 |                           | 0  | 0  |
| b3100  | 74   | E. coli    | yqjK      | 87.88    | 0.000 | 0.000 | 0.000 | 0.000 |                           | 0  | 0  |
| yqjE   | 860  | E. coli    | yqjE      | 56.92    | 0.000 | 0.000 | 0.000 | 0.000 |                           | 0  | 0  |
| pagK   | 1028 | Salmonella | no        | 0.00     | 0.530 | 0.709 | 0.557 | 0.326 | AACCATTTATAAAATATTTAACT   | 0  | 1  |
| pdgL   | 1029 | Salmonella | no        | 0.00     | 0.000 | 0.466 | 0.578 | 0.318 | GAGAGTTTATATTTTGCTTATAC   | 0  | 1  |
| pdgL   | 1030 | Salmonella | no        | 0.00     | 0.000 | 0.522 | 0.463 | 0.327 | TTATTTTAAACCATCTGTTTAAAGC | 1  | 0  |
| proP   | 1035 | Salmonella | proP      | 78.00    | 0.651 | 0.395 | 0.000 | 0.313 | ACATATTTAAACCCTGTTAGGGT   | 1  | 0  |
| hemL   | 1031 | E. coli    | hemL      | 82.00    | 0.000 | 0.500 | 0.711 | 0.487 | TGATGTTTGACGAGTATTTAACT   | 1  | 0  |
| hemL   | 1032 | E. coli    | hemL      | 82.00    | 0.741 | 0.242 | 0.000 | 0.223 | TGTTATTTCATAACAAGTTAAATA  | 0  | 1  |
| proP   | 1033 | E. coli    | proP      | 78.00    | 0.000 | 0.239 | 0.000 | 0.647 | TTTCGTTTAGGACTCATTGATGT   | 0  | 1  |
| proP   | 1034 | E. coli    | proP      | 78.00    | 0.000 | 0.274 | 0.557 | 0.356 | TGAAGTTGATCACAATTTAAAC    | 1  | 0  |

### RNA Pol Sites

| Gene   | Code | Close II | Close I | Medium II | Medium I | Remote II | Remote I | CLOSE_2_-10 | CLOSE_2_-35 | CLOSE_2_1 | CLOSE_1_-10 |
|--------|------|----------|---------|-----------|----------|-----------|----------|-------------|-------------|-----------|-------------|
|        |      | P1       | P2      | P3        | P4       | P5        | P6       |             |             |           |             |
| b2833  | 73   | 0.510    | 0.000   | 0.000     | 0.000    | 0.000     | 0.000    | tattat      | no-ttgaca   | -31       | no-tataat   |
| b1825  | 6    | 0.420    | 0.373   | 0.000     | 0.000    | 0.563     | 0.549    | no-tataat   | no-ttgaca   | 0         | no-tataat   |
| b1826  | 28   | 0.420    | 0.373   | 0.000     | 0.000    | 0.000     | 0.000    | TTTAAT      | no-ttgaca   | -37       | TAAGGT      |
| nmpC   | 221  | 0.520    | 0.759   | 0.495     | 0.441    | 0.500     | 0.637    | TCAAAT      | no-ttgaca   | -30       | TATAAA      |
| slyB   | 351  | 0.310    | 0.000   | 0.616     | 0.667    | 0.469     | 0.549    | taccgt      | no-ttgaca   | -43       | no-tataat   |
| ompT   | 230  | 0.310    | 0.771   | 0.000     | 0.373    | 0.000     | 0.000    | TAAGTT      | no-ttgaca   | -36       | TATAAA      |
| ybjX   | 358  | 0.520    | 0.000   | 0.000     | 0.000    | 0.000     | 0.000    | TAAAT       | no-ttgaca   | -32       | no-tataat   |
| ybjX   | 360  | 0.470    | 0.000   | 0.000     | 0.000    | 0.000     | 0.000    | TGAAAT      | no-ttgaca   | -32       | no-tataat   |
| yhiE   | 606  | 0.570    | 0.000   | 0.414     | 0.000    | 0.688     | 0.657    | taggat      | no-ttgaca   | -37       | no-tataat   |
| ompT   | 226  | 0.420    | 0.410   | 0.000     | 0.627    | 0.000     | 0.000    | TGTAAT      | no-ttgaca   | -33       | TAAGTT      |
| yrbL   | 929  | 0.410    | 0.000   | 0.000     | 0.000    | 0.000     | 0.000    | gatcgt      | no-ttgaca   | -40       | no-tataat   |
| ybcU   | 357  | 0.500    | 0.000   | 0.000     | 0.000    | 0.000     | 0.000    | TACGAT      | no-ttgaca   | -32       | no-tataat   |
| pagC   | 1026 | 0.670    | 0.000   | 0.000     | 0.000    | 0.000     | 0.000    | tgttat      | no-ttgaca   | -41       | no-tataat   |
| rstA   | 349  | 0.680    | 0.819   | 0.414     | 0.000    | 0.000     | 0.000    | TATGTT      | TGGAAG      | -43       | TATGTT      |
| ybjX   | 438  | 0.420    | 0.506   | 0.434     | 0.314    | 0.000     | 0.000    | TGTATT      | CTGACG      | -48       | TGTATT      |
| udg    | 729  | 0.520    | 0.000   | 0.000     | 0.608    | 0.000     | 0.804    | TTTTAT      | no-ttgaca   | -40       | no-tataat   |
| mig-14 | 568  | 0.340    | 0.000   | 0.707     | 0.402    | 0.000     | 0.000    | ttttat      | no-ttgaca   | -32       | no-tataat   |
| pagC   | 1027 | 0.000    | 0.000   | 0.670     | 0.670    | 0.670     | 0.670    | CATATT      | no-ttgaca   | -46       | no-tataat   |
| pagD   | 704  | 0.700    | 0.410   | 0.515     | 0.412    | 0.354     | 0.647    | AATAAT      | no-ttgaca   | -31       | AATATT      |
| rstA   | 330  | 0.550    | 0.000   | 0.000     | 0.657    | 0.000     | 0.000    | taaaaa      | no-ttgaca   | -38       | no-tataat   |
| mgtC   | 623  | 0.000    | 0.000   | 0.343     | 0.402    | 0.000     | 0.000    | no-tataat   | no-ttgaca   | 0         | no-tataat   |
| pmrD   | 513  | 0.400    | 0.000   | 0.000     | 0.000    | 0.000     | 0.000    | TAACGT      | no-ttgaca   | -32       | no-tataat   |
| yrbL   | 943  | 0.630    | 0.000   | 0.000     | 0.529    | 0.000     | 0.000    | taaatt      | no-ttgaca   | -36       | no-tataat   |
| phoP   | 277  | 0.700    | 0.000   | 0.000     | 0.000    | 0.000     | 0.000    | CATAAT      | no-ttgaca   | -32       | no-tataat   |
| phoP   | 604  | 0.690    | 0.494   | 0.414     | 0.000    | 0.000     | 0.000    | CATAAT      | no-ttgaca   | -32       | TAGACT      |
| mgtA   | 599  | 0.680    | 0.000   | 0.909     | 0.000    | 0.448     | 0.333    | cataat      | no-ttgaca   | -43       | no-tataat   |
| mgtA   | 149  | 0.510    | 0.000   | 0.000     | 0.500    | 0.563     | 0.000    | tattat      | no-ttgaca   | -34       | no-tataat   |
| pmrD   | 125  | 0.630    | 0.843   | 0.000     | 0.000    | 0.000     | 0.000    | TAAATT      | no-ttgaca   | -32       | GATAAT      |
| yhiW   | 743  | 0.550    | 0.000   | 0.000     | 0.000    | 0.000     | 0.000    | GAAAT       | no-ttgaca   | -26       | no-tataat   |
| yhiW   | 646  | 0.340    | 0.410   | 0.515     | 0.402    | 0.781     | 0.667    | TTTACT      | GTGCGA      | -48       | TTTACT      |
| ybjX   | 417  | 0.000    | 0.000   | 0.434     | 0.412    | 0.000     | 0.000    | no-tataat   | no-ttgaca   | 0         | no-tataat   |
| virK   | 642  | 0.000    | 0.000   | 0.606     | 0.304    | 0.000     | 0.000    | no-tataat   | no-ttgaca   | 0         | no-tataat   |
| pagP   | 602  | 0.510    | 0.000   | 0.475     | 0.000    | 0.000     | 0.000    | tattat      | no-ttgaca   | -45       | no-tataat   |
| ybjX   | 402  | 0.430    | 0.000   | 0.000     | 0.000    | 0.000     | 0.000    | TTCAAT      | no-ttgaca   | -32       | no-tataat   |
| ugtL   | 883  | 0.420    | 0.783   | 0.000     | 0.824    | 0.740     | 0.500    | TATAAG      | no-ttgaca   | -37       | TAAACT      |
| slyB   | 352  | 0.510    | 0.000   | 0.000     | 0.765    | 0.000     | 0.304    | TATGAT      | no-ttgaca   | -34       | no-tataat   |
| nmpC   | 224  | 0.690    | 0.000   | 0.000     | 0.000    | 0.000     | 0.000    | tataag      | no-ttgaca   | -39       | no-tataat   |
| hdeA   | 137  | 0.660    | 0.000   | 0.000     | 0.696    | 0.000     | 0.000    | TATAAC      | no-ttgaca   | -31       | no-tataat   |
| hdeD   | 146  | 0.680    | 0.000   | 0.545     | 0.333    | 0.427     | 0.480    | tatttt      | no-ttgaca   | -43       | no-tataat   |

**RNA Pol Sites**

| Gene   | Code | Close II | Close I | Medium II | Medium I | Remote II | Remote I | CLOSE_2_-10 | CLOSE_2_-35 | CLOSE_2_1 | CLOSE_1_-10 |
|--------|------|----------|---------|-----------|----------|-----------|----------|-------------|-------------|-----------|-------------|
|        |      | P1       | P2      | P3        | P4       | P5        | P6       |             |             |           |             |
| hilA   | 822  | 0.830    | 0.000   | 0.505     | 0.000    | 0.354     | 0.500    | tagaat      | no-ttgaca   | -28       | no-tataat   |
| slyB   | 350  | 0.560    | 0.000   | 0.000     | 0.500    | 0.354     | 0.000    | tttcat      | no-ttgaca   | -29       | no-tataat   |
| ybjX   | 359  | 0.310    | 0.000   | 0.000     | 0.000    | 0.000     | 0.000    | TACGTT      | no-ttgaca   | -35       | no-tataat   |
| rstA   | 339  | 0.670    | 0.807   | 0.000     | 0.000    | 0.000     | 0.000    | tattgt      | tagtaa      | -43       | tattgt      |
| virK   | 643  | 0.000    | 0.000   | 0.606     | 0.304    | 0.000     | 0.000    | no-tataat   | no-ttgaca   | 0         | no-tataat   |
| mgtC   | 681  | 0.000    | 0.000   | 0.414     | 0.931    | 0.000     | 0.529    | no-tataat   | no-ttgaca   | 0         | no-tataat   |
| pipD   | 847  | 0.340    | 0.410   | 0.000     | 0.637    | 0.000     | 0.000    | AAGAAT      | AAGAGA      | -46       | AAGAAT      |
| pgtE   | 720  | 0.530    | 0.000   | 0.374     | 0.422    | 0.000     | 0.333    | TCAAAT      | no-ttgaca   | -35       | no-tataat   |
| mgtC   | 925  | 0.340    | 0.000   | 0.000     | 0.000    | 0.000     | 0.000    | TTTACT      | no-ttgaca   | -24       | no-tataat   |
| yeaF   | 469  | 0.000    | 0.000   | 0.414     | 0.402    | 0.354     | 0.588    | no-tataat   | no-ttgaca   | 0         | no-tataat   |
| trs5_8 | 354  | 0.360    | 0.699   | 0.414     | 0.000    | 0.000     | 0.000    | TATGGG      | no-ttgaca   | -45       | TATTTT      |
| yeaF   | 464  | 0.410    | 0.000   | 0.000     | 0.000    | 0.000     | 0.000    | CAAAC       | no-ttgaca   | -28       | no-tataat   |
| mgtC   | 718  | 0.340    | 0.000   | 0.414     | 0.931    | 0.000     | 0.529    | CATATT      | no-ttgaca   | -46       | no-tataat   |
| yobG   | 861  | 0.420    | 0.494   | 0.000     | 0.422    | 0.000     | 0.000    | GATAAT      | no-ttgaca   | -32       | TAAGAT      |
| yaG    | 753  | 0.000    | 0.000   | 0.414     | 0.000    | 0.438     | 0.529    | no-tataat   | no-ttgaca   | 0         | no-tataat   |
| ompX   | 242  | 0.800    | 0.000   | 0.616     | 0.510    | 0.427     | 0.451    | taaaat      | no-ttgaca   | -42       | no-tataat   |
| ompX   | 248  | 0.820    | 0.000   | 0.515     | 0.627    | 0.573     | 0.382    | taaaat      | no-ttgaca   | -41       | no-tataat   |
| yhdG   | 546  | 0.000    | 0.000   | 0.000     | 0.000    | 0.000     | 0.000    | no-tataat   | no-ttgaca   | 0         | no-tataat   |
| yaiN   | 356  | 0.000    | 0.000   | 0.000     | 0.000    | 0.000     | 0.000    | no-tataat   | no-ttgaca   | 0         | no-tataat   |
| pyrI   | 286  | 0.000    | 0.000   | 0.000     | 0.000    | 0.000     | 0.000    | no-tataat   | no-ttgaca   | 0         | no-tataat   |
| ygiW   | 512  | 0.000    | 0.000   | 0.000     | 0.000    | 0.000     | 0.000    | no-tataat   | no-ttgaca   | 0         | no-tataat   |
| gadB   | 78   | 0.000    | 0.000   | 0.000     | 0.000    | 0.000     | 0.000    | no-tataat   | no-ttgaca   | 0         | no-tataat   |
| gadA   | 77   | 0.000    | 0.000   | 0.000     | 0.000    | 0.000     | 0.000    | no-tataat   | no-ttgaca   | 0         | no-tataat   |
| dps    | 75   | 0.000    | 0.000   | 0.000     | 0.000    | 0.000     | 0.000    | no-tataat   | no-ttgaca   | 0         | no-tataat   |
| b3100  | 74   | 0.000    | 0.000   | 0.000     | 0.000    | 0.000     | 0.000    | no-tataat   | no-ttgaca   | 0         | no-tataat   |
| yqjE   | 860  | 0.000    | 0.000   | 0.000     | 0.000    | 0.000     | 0.000    | no-tataat   | no-ttgaca   | 0         | no-tataat   |
| no     | 1028 | 0.400    | 0.000   | 0.550     | 0.800    | 0.000     | 0.000    | GATGGT      | no-ttgaca   | -38       | no-tataat   |
| no     | 1029 | 0.450    | 0.550   | 0.550     | 0.590    | 0.530     | 0.560    | GATAAG      | no-ttgaca   | -32       | GTGATA      |
| no     | 1030 | 0.430    | 0.600   | 0.000     | 0.000    | 0.610     | 0.670    | TAATCT      | no-ttgaca   | -34       | CATAAT      |
| proP   | 1035 | 0.410    | 0.000   | 0.000     | 0.000    | 0.000     | 0.000    | CATTAA      | no-ttgaca   | -32       | no-tataat   |
| hemL   | 1031 | 0.790    | 0.500   | 0.400     | 0.400    | 0.000     | 0.000    | TAACAT      | no-ttgaca   | -34       | TAGCAG      |
| hemL   | 1032 | 0.600    | 0.000   | 0.000     | 0.000    | 0.000     | 0.000    | TAGCAG      | no-ttgaca   | -32       | no-tataat   |
| proP   | 1033 | 0.000    | 0.000   | 0.400     | 0.700    | 0.560     | 0.660    | no-tataat   | no-ttgaca   | 0         | no-tataat   |
| proP   | 1034 | 0.450    | 0.000   | 0.000     | 0.000    | 0.400     | 0.500    | CATTAA      | no-ttgaca   | -36       | no-tataat   |

## RNA Pol Sites

| <i>Gene</i> | <i>Code</i> | <i>CLOSE_1_-35</i> | <i>CLOSE_1_1</i> | <i>MEDIUM_2_-10</i> | <i>MEDIUM_2_-35</i> | <i>MEDIUM_2_1</i> | <i>MEDIUM_1_-10</i> | <i>MEDIUM_1_-35</i> | <i>MEDIUM_1_1</i> |
|-------------|-------------|--------------------|------------------|---------------------|---------------------|-------------------|---------------------|---------------------|-------------------|
| b2833       | 73          | no-ttgaca          | 0                | no-tataat           | no-ttgaca           | 0                 | no-tataat           | no-ttgaca           | 0                 |
| b1825       | 6           | no-ttgaca          | 0                | no-tataat           | no-ttgaca           | 0                 | no-tataat           | no-ttgaca           | 0                 |
| b1826       | 28          | CTAACG             | -47              | no-tataat           | no-ttgaca           | 0                 | no-tataat           | no-ttgaca           | 0                 |
| nmpC        | 221         | TTGAAC             | -47              | TATAAA              | no-ttgaca           | -68               | TATTTT              | TTAATA              | -88               |
| slyB        | 351         | no-ttgaca          | 0                | tataat              | no-ttgaca           | -99               | aataat              | tagtaa              | -73               |
| ompT        | 230         | TGTAAT             | -47              | no-tataat           | no-ttgaca           | 0                 | AATCAT              | TAGATA              | -61               |
| ybjX        | 358         | no-ttgaca          | 0                | no-tataat           | no-ttgaca           | 0                 | no-tataat           | no-ttgaca           | 0                 |
| ybjX        | 360         | no-ttgaca          | 0                | no-tataat           | no-ttgaca           | 0                 | no-tataat           | no-ttgaca           | 0                 |
| yhiE        | 606         | no-ttgaca          | 0                | tagtgt              | no-ttgaca           | -84               | no-tataat           | no-ttgaca           | 0                 |
| ompT        | 226         | TGGAGC             | -47              | no-tataat           | no-ttgaca           | 0                 | TATAAA              | ATGTAA              | -58               |
| yrbL        | 929         | no-ttgaca          | 0                | no-tataat           | no-ttgaca           | 0                 | no-tataat           | no-ttgaca           | 0                 |
| ybcU        | 357         | no-ttgaca          | 0                | no-tataat           | no-ttgaca           | 0                 | no-tataat           | no-ttgaca           | 0                 |
| pagC        | 1026        | no-ttgaca          | 0                | no-tataat           | no-ttgaca           | 0                 | no-tataat           | no-ttgaca           | 0                 |
| rstA        | 349         | TGGAAG             | -43              | TATTCT              | no-ttgaca           | -60               | no-tataat           | no-ttgaca           | 0                 |
| ybjX        | 438         | CTGACG             | -48              | TTCAAT              | no-ttgaca           | -79               | TGTGGT              | TTGACG              | -79               |
| udg         | 729         | no-ttgaca          | 0                | no-tataat           | no-ttgaca           | 0                 | TAATAT              | TTCTTA              | -72               |
| mig-14      | 568         | no-ttgaca          | 0                | aataat              | no-ttgaca           | -58               | tagcat              | ttaagc              | -65               |
| pagC        | 1027        | no-ttgaca          | 0                | TATGTT              | no-ttgaca           | -89               | TATAAT              | TTTACG              | -57               |
| pagD        | 704         | TCCAAA             | -49              | TATTAT              | no-ttgaca           | -95               | TATAAA              | GCGATA              | -83               |
| rstA        | 330         | no-ttgaca          | 0                | no-tataat           | no-ttgaca           | 0                 | tattgt              | tagtaa              | -54               |
| mgtC        | 623         | no-ttgaca          | 0                | TATAGC              | CAGAAA              | -82               | TATTCT              | GTGTGC              | -95               |
| pmrD        | 513         | no-ttgaca          | 0                | no-tataat           | no-ttgaca           | 0                 | no-tataat           | no-ttgaca           | 0                 |
| yrbL        | 943         | no-ttgaca          | 0                | no-tataat           | no-ttgaca           | 0                 | taaatt              | tgtcca              | -50               |
| phoP        | 277         | no-ttgaca          | 0                | no-tataat           | no-ttgaca           | 0                 | no-tataat           | no-ttgaca           | 0                 |
| phoP        | 604         | TCCCCA             | -46              | TATTGT              | no-ttgaca           | -57               | no-tataat           | no-ttgaca           | 0                 |
| mgtA        | 599         | no-ttgaca          | 0                | tataat              | no-ttgaca           | -75               | no-tataat           | no-ttgaca           | 0                 |
| mgtA        | 149         | no-ttgaca          | 0                | no-tataat           | no-ttgaca           | 0                 | tattat              | tatatc              | -60               |
| pmrD        | 125         | ATGTGA             | -62              | no-tataat           | no-ttgaca           | 0                 | no-tataat           | no-ttgaca           | 0                 |
| yhiW        | 743         | no-ttgaca          | 0                | no-tataat           | no-ttgaca           | 0                 | no-tataat           | no-ttgaca           | 0                 |
| yhiW        | 646         | GTGCGA             | -48              | TATTAT              | no-ttgaca           | -54               | TAAATT              | CTGTTA              | -92               |
| ybjX        | 417         | no-ttgaca          | 0                | TTCAAT              | no-ttgaca           | -90               | TGTATT              | CTGACG              | -59               |
| virK        | 642         | no-ttgaca          | 0                | tataag              | no-ttgaca           | -87               | tacggt              | tgtaca              | -57               |
| pagP        | 602         | no-ttgaca          | 0                | tcgaat              | no-ttgaca           | -54               | no-tataat           | no-ttgaca           | 0                 |
| ybjX        | 402         | no-ttgaca          | 0                | no-tataat           | no-ttgaca           | 0                 | no-tataat           | no-ttgaca           | 0                 |
| ugtL        | 883         | TAGAAA             | -45              | no-tataat           | no-ttgaca           | 0                 | TATTAT              | CTTATA              | -56               |
| slyB        | 352         | no-ttgaca          | 0                | no-tataat           | no-ttgaca           | 0                 | TATAAT              | ATGACC              | -88               |
| nmpC        | 224         | no-ttgaca          | 0                | no-tataat           | no-ttgaca           | 0                 | no-tataat           | no-ttgaca           | 0                 |
| hdeA        | 137         | no-ttgaca          | 0                | no-tataat           | no-ttgaca           | 0                 | TATAGT              | TTGATT              | -75               |
| hdeD        | 146         | no-ttgaca          | 0                | tacaat              | no-ttgaca           | -54               | gatact              | tacaat              | -79               |

## RNA Pol Sites

| <i>Gene</i> | <i>Code</i> | <i>CLOSE_1_-35</i> | <i>CLOSE_1_1</i> | <i>MEDIUM_2_-10</i> | <i>MEDIUM_2_-35</i> | <i>MEDIUM_2_1</i> | <i>MEDIUM_1_-10</i> | <i>MEDIUM_1_-35</i> | <i>MEDIUM_1_1</i> |
|-------------|-------------|--------------------|------------------|---------------------|---------------------|-------------------|---------------------|---------------------|-------------------|
| hilA        | 822         | no-ttgaca          | 0                | cataat              | no-ttgaca           | -52               | no-tataat           | no-ttgaca           | 0                 |
| slyB        | 350         | no-ttgaca          | 0                | no-tataat           | no-ttgaca           | 0                 | tataact             | taacca              | -86               |
| ybjX        | 359         | no-ttgaca          | 0                | no-tataat           | no-ttgaca           | 0                 | no-tataat           | no-ttgaca           | 0                 |
| rstA        | 339         | tagtaa             | -43              | no-tataat           | no-ttgaca           | 0                 | no-tataat           | no-ttgaca           | 0                 |
| virK        | 643         | no-ttgaca          | 0                | tataag              | no-ttgaca           | -81               | tacgtt              | tgtaca              | -51               |
| mgtC        | 681         | no-ttgaca          | 0                | TATGTT              | no-ttgaca           | -100              | TATAAT              | TTTACG              | -68               |
| pipD        | 847         | AAGAGA             | -46              | no-tataat           | no-ttgaca           | 0                 | CATAAT              | TTTCCA              | -100              |
| pgtE        | 720         | no-ttgaca          | 0                | TAAAAA              | no-ttgaca           | -67               | TAACTT              | CTGAGC              | -50               |
| mgtC        | 925         | no-ttgaca          | 0                | no-tataat           | no-ttgaca           | 0                 | no-tataat           | no-ttgaca           | 0                 |
| yeaF        | 469         | no-ttgaca          | 0                | TAAATT              | AAGACC              | -50               | TAAATT              | AAGACC              | -50               |
| trs5_8      | 354         | CTGACT             | -45              | TAGGAT              | no-ttgaca           | -87               | no-tataat           | no-ttgaca           | 0                 |
| yeaF        | 464         | no-ttgaca          | 0                | no-tataat           | no-ttgaca           | 0                 | no-tataat           | no-ttgaca           | 0                 |
| mgtC        | 718         | no-ttgaca          | 0                | TATGTT              | no-ttgaca           | -89               | TATAAT              | TTTACG              | -57               |
| yobG        | 861         | GTAACT             | -47              | no-tataat           | no-ttgaca           | 0                 | TAAGAT              | ATGATA              | -52               |
| yaig        | 753         | no-ttgaca          | 0                | tagatt              | no-ttgaca           | -79               | no-tataat           | no-ttgaca           | 0                 |
| ompX        | 242         | no-ttgaca          | 0                | aataat              | no-ttgaca           | -86               | tggaat              | tgacta              | -61               |
| ompX        | 248         | no-ttgaca          | 0                | aataat              | no-ttgaca           | -85               | taaatt              | tccagg              | -52               |
| yhdG        | 546         | no-ttgaca          | 0                | no-tataat           | no-ttgaca           | 0                 | no-tataat           | no-ttgaca           | 0                 |
| yaiN        | 356         | no-ttgaca          | 0                | no-tataat           | no-ttgaca           | 0                 | no-tataat           | no-ttgaca           | 0                 |
| pyrI        | 286         | no-ttgaca          | 0                | no-tataat           | no-ttgaca           | 0                 | no-tataat           | no-ttgaca           | 0                 |
| ygiW        | 512         | no-ttgaca          | 0                | no-tataat           | no-ttgaca           | 0                 | no-tataat           | no-ttgaca           | 0                 |
| gadB        | 78          | no-ttgaca          | 0                | no-tataat           | no-ttgaca           | 0                 | no-tataat           | no-ttgaca           | 0                 |
| gadA        | 77          | no-ttgaca          | 0                | no-tataat           | no-ttgaca           | 0                 | no-tataat           | no-ttgaca           | 0                 |
| dps         | 75          | no-ttgaca          | 0                | no-tataat           | no-ttgaca           | 0                 | no-tataat           | no-ttgaca           | 0                 |
| b3100       | 74          | no-ttgaca          | 0                | no-tataat           | no-ttgaca           | 0                 | no-tataat           | no-ttgaca           | 0                 |
| yqjE        | 860         | no-ttgaca          | 0                | no-tataat           | no-ttgaca           | 0                 | no-tataat           | no-ttgaca           | 0                 |
| no          | 1028        | no-ttgaca          | 0                | TATTTT              | no-ttgaca           | -60               | TAATAT              | CTGATG              | -63               |
| no          | 1029        | AAAGAT             | -49              | AAAGAT              | no-ttgaca           | -61               | TATTTT              | CAGATT              | -65               |
| no          | 1030        | CATAAT             | -52              | no-tataat           | no-ttgaca           | 0                 | no-tataat           | no-ttgaca           | 0                 |
| proP        | 1035        | no-ttgaca          | 0                | no-tataat           | no-ttgaca           | 0                 | no-tataat           | no-ttgaca           | 0                 |
| hemL        | 1031        | TTGTTA             | -44              | CATGAG              | no-ttgaca           | -67               | CATGAG              | TTTTCT              | -67               |
| hemL        | 1032        | no-ttgaca          | 0                | no-tataat           | no-ttgaca           | 0                 | no-tataat           | no-ttgaca           | 0                 |
| proP        | 1033        | no-ttgaca          | 0                | CATTAA              | no-ttgaca           | -72               | TAGGGT              | TTGATC              | -62               |
| proP        | 1034        | no-ttgaca          | 0                | no-tataat           | no-ttgaca           | 0                 | no-tataat           | no-ttgaca           | 0                 |

## RNA Pol Sites

| Gene   | Code | REMOTE_2_-10 | REMOTE_2_-35 | REMOTE_2_1 | REMOTE_1_-10 | REMOTE_1_-35 | REMOTE_1_1 |
|--------|------|--------------|--------------|------------|--------------|--------------|------------|
| b2833  | 73   | no-tataat    | no-ttgaca    | 0          | no-tataat    | no-ttgaca    | 0          |
| b1825  | 6    | no-tataat    | no-ttgaca    | 0          | no-tataat    | no-ttgaca    | 0          |
| b1826  | 28   | no-tataat    | no-ttgaca    | 0          | no-tataat    | no-ttgaca    | 0          |
| nmpC   | 221  | TAAAAA       | no-ttgaca    | -140       | TAGGAT       | TTTATT       | -113       |
| slyB   | 351  | catatt       | no-ttgaca    | -133       | cattat       | ttataa       | -119       |
| ompT   | 230  | no-tataat    | no-ttgaca    | 0          | no-tataat    | no-ttgaca    | 0          |
| ybjX   | 358  | no-tataat    | no-ttgaca    | 0          | no-tataat    | no-ttgaca    | 0          |
| ybjX   | 360  | no-tataat    | no-ttgaca    | 0          | no-tataat    | no-ttgaca    | 0          |
| yhiE   | 606  | aataat       | no-ttgaca    | -169       | taaagt       | tagacg       | -116       |
| ompT   | 226  | no-tataat    | no-ttgaca    | 0          | no-tataat    | no-ttgaca    | 0          |
| yrbL   | 929  | no-tataat    | no-ttgaca    | 0          | no-tataat    | no-ttgaca    | 0          |
| ybcU   | 357  | no-tataat    | no-ttgaca    | 0          | no-tataat    | no-ttgaca    | 0          |
| pagC   | 1026 | no-tataat    | no-ttgaca    | 0          | no-tataat    | no-ttgaca    | 0          |
| rstA   | 349  | no-tataat    | no-ttgaca    | 0          | no-tataat    | no-ttgaca    | 0          |
| ybjX   | 438  | no-tataat    | no-ttgaca    | 0          | no-tataat    | no-ttgaca    | 0          |
| udg    | 729  | no-tataat    | no-ttgaca    | 0          | TATACT       | TTGTTT       | -142       |
| mig-14 | 568  | no-tataat    | no-ttgaca    | 0          | no-tataat    | no-ttgaca    | 0          |
| pagC   | 1027 | no-tataat    | no-ttgaca    | 0          | TACAAC       | GTGACG       | -207       |
| pagD   | 704  | AAAAAT       | no-ttgaca    | -128       | CATAAT       | TTGAAT       | -145       |
| rstA   | 330  | no-tataat    | no-ttgaca    | 0          | no-tataat    | no-ttgaca    | 0          |
| mgtC   | 623  | no-tataat    | no-ttgaca    | 0          | no-tataat    | no-ttgaca    | 0          |
| pmrD   | 513  | no-tataat    | no-ttgaca    | 0          | no-tataat    | no-ttgaca    | 0          |
| yrbL   | 943  | no-tataat    | no-ttgaca    | 0          | no-tataat    | no-ttgaca    | 0          |
| phoP   | 277  | no-tataat    | no-ttgaca    | 0          | no-tataat    | no-ttgaca    | 0          |
| phoP   | 604  | no-tataat    | no-ttgaca    | 0          | no-tataat    | no-ttgaca    | 0          |
| mgtA   | 599  | cacaat       | no-ttgaca    | -207       | gagaat       | tgaacc       | -149       |
| mgtA   | 149  | tttatt       | no-ttgaca    | -235       | no-tataat    | no-ttgaca    | 0          |
| pmrD   | 125  | no-tataat    | no-ttgaca    | 0          | no-tataat    | no-ttgaca    | 0          |
| yhiW   | 743  | no-tataat    | no-ttgaca    | 0          | no-tataat    | no-ttgaca    | 0          |
| yhiW   | 646  | TATACT       | no-ttgaca    | -161       | TATAAG       | TTGAAA       | -188       |
| ybjX   | 417  | no-tataat    | no-ttgaca    | 0          | no-tataat    | no-ttgaca    | 0          |
| virK   | 642  | no-tataat    | no-ttgaca    | 0          | no-tataat    | no-ttgaca    | 0          |
| pagP   | 602  | no-tataat    | no-ttgaca    | 0          | no-tataat    | no-ttgaca    | 0          |
| ybjX   | 402  | no-tataat    | no-ttgaca    | 0          | no-tataat    | no-ttgaca    | 0          |
| ugtL   | 883  | TAAAAT       | no-ttgaca    | -207       | TATATT       | TTACTC       | -161       |
| slyB   | 352  | no-tataat    | no-ttgaca    | 0          | TAGCGT       | TTTAGC       | -115       |
| nmpC   | 224  | no-tataat    | no-ttgaca    | 0          | no-tataat    | no-ttgaca    | 0          |
| hdeA   | 137  | no-tataat    | no-ttgaca    | 0          | no-tataat    | no-ttgaca    | 0          |
| hdeD   | 146  | tagatt       | no-ttgaca    | -138       | taattt       | ttgata       | -163       |

## RNA Pol Sites

| Gene   | Code | REMOTE_2_-10 | REMOTE_2_-35 | REMOTE_2_1 | REMOTE_1_-10 | REMOTE_1_-35 | REMOTE_1_1 |
|--------|------|--------------|--------------|------------|--------------|--------------|------------|
| hilA   | 822  | tgtatt       | no-ttgaca    | -123       | tattat       | tctatc       | -132       |
| slyB   | 350  | tttcat       | no-ttgaca    | -119       | no-tataat    | no-ttgaca    | 0          |
| ybjX   | 359  | no-tataat    | no-ttgaca    | 0          | no-tataat    | no-ttgaca    | 0          |
| rstA   | 339  | no-tataat    | no-ttgaca    | 0          | no-tataat    | no-ttgaca    | 0          |
| virK   | 643  | no-tataat    | no-ttgaca    | 0          | no-tataat    | no-ttgaca    | 0          |
| mgtC   | 681  | no-tataat    | no-ttgaca    | 0          | TACAAC       | GTGACG       | -218       |
| pipD   | 847  | no-tataat    | no-ttgaca    | 0          | no-tataat    | no-ttgaca    | 0          |
| pgtE   | 720  | no-tataat    | no-ttgaca    | 0          | TATGAG       | ATCACC       | -163       |
| mgtC   | 925  | no-tataat    | no-ttgaca    | 0          | no-tataat    | no-ttgaca    | 0          |
| yeaF   | 469  | TGTATT       | no-ttgaca    | -143       | TAAACT       | TTGGGT       | -153       |
| trs5_8 | 354  | no-tataat    | no-ttgaca    | 0          | no-tataat    | no-ttgaca    | 0          |
| yeaF   | 464  | no-tataat    | no-ttgaca    | 0          | no-tataat    | no-ttgaca    | 0          |
| mgtC   | 718  | no-tataat    | no-ttgaca    | 0          | TACAAC       | GTGACG       | -207       |
| yobG   | 861  | no-tataat    | no-ttgaca    | 0          | no-tataat    | no-ttgaca    | 0          |
| yaG    | 753  | tataag       | no-ttgaca    | -150       | tataatc      | tacaaa       | -117       |
| ompX   | 242  | taaatt       | no-ttgaca    | -153       | aatact       | tgaatg       | -119       |
| ompX   | 248  | cattat       | no-ttgaca    | -118       | gatgtt       | ttggtg       | -150       |
| yhdG   | 546  | no-tataat    | no-ttgaca    | 0          | no-tataat    | no-ttgaca    | 0          |
| yaiN   | 356  | no-tataat    | no-ttgaca    | 0          | no-tataat    | no-ttgaca    | 0          |
| pyrI   | 286  | no-tataat    | no-ttgaca    | 0          | no-tataat    | no-ttgaca    | 0          |
| ygiW   | 512  | no-tataat    | no-ttgaca    | 0          | no-tataat    | no-ttgaca    | 0          |
| gadB   | 78   | no-tataat    | no-ttgaca    | 0          | no-tataat    | no-ttgaca    | 0          |
| gadA   | 77   | no-tataat    | no-ttgaca    | 0          | no-tataat    | no-ttgaca    | 0          |
| dps    | 75   | no-tataat    | no-ttgaca    | 0          | no-tataat    | no-ttgaca    | 0          |
| b3100  | 74   | no-tataat    | no-ttgaca    | 0          | no-tataat    | no-ttgaca    | 0          |
| yqjE   | 860  | no-tataat    | no-ttgaca    | 0          | no-tataat    | no-ttgaca    | 0          |
| no     | 1028 | no-tataat    | no-ttgaca    | 0          | no-tataat    | no-ttgaca    | 0          |
| no     | 1029 | GCTAAT       | no-ttgaca    | -90        | GCTAAT       | TTAACC       | -90        |
| no     | 1030 | CATAAT       | no-ttgaca    | -88        | TAAAAT       | CTCTCG       | -88        |
| proP   | 1035 | no-tataat    | no-ttgaca    | 0          | no-tataat    | no-ttgaca    | 0          |
| hemL   | 1031 | no-tataat    | no-ttgaca    | 0          | no-tataat    | no-ttgaca    | 0          |
| hemL   | 1032 | no-tataat    | no-ttgaca    | 0          | no-tataat    | no-ttgaca    | 0          |
| proP   | 1033 | TACATT       | no-ttgaca    | -92        | TACATT       | TTCAGG       | -92        |
| proP   | 1034 | TACATT       | no-ttgaca    | -84        | TACATT       | TTCAGG       | -84        |

| Gene   | Code | Activated/Repressed |     |       | Other TFs |      |       |       |      |      |       |       |       |
|--------|------|---------------------|-----|-------|-----------|------|-------|-------|------|------|-------|-------|-------|
|        |      | Activated Repressed |     | AraC  | ArcA      | ArgR | CRP   | CytR  | DeoR | DnaA | FIS   | FNR   |       |
|        |      | A1                  | A2  | I1    | I2        | I3   | I4    | I5    | I6   | I7   | I8    | I9    |       |
| b2833  | 73   | 1                   | 0   | 0.5   | 0.5       | 0.5  | 0.5   | 0.5   | 0.5  | 0.5  | 0.5   | 0.5   | 0.5   |
| b1825  | 6    | 1                   | 0   | 0.5   | 0.5       | 0.5  | 0.5   | 0.5   | 0.5  | 0.5  | 0.5   | 0.845 | 0.5   |
| b1826  | 28   | 1                   | 0   | 0.5   | 0.5       | 0.5  | 0.465 | 0.5   | 0.5  | 0.5  | 0.5   | 0.5   | 0.5   |
| nmpC   | 221  | 0                   | 1   | 0.5   | 0.48      | 0.5  | 0.05  | 0.5   | 0.5  | 0.5  | 0.5   | 0.46  | 0.5   |
| slyB   | 351  | 1                   | 0   | 0.5   | 0.5       | 0.5  | 0.5   | 0.5   | 0.5  | 0.5  | 0.5   | 0.455 | 0.5   |
| ompT   | 230  | 1                   | 0   | 0.5   | 0.475     | 0.5  | 0.47  | 0.5   | 0.5  | 0.5  | 0.5   | 0.465 | 0.5   |
| ybjX   | 358  | 1                   | 0   | 0.5   | 0.5       | 0.5  | 0.5   | 0.5   | 0.5  | 0.5  | 0.5   | 0.5   | 0.5   |
| ybjX   | 360  | 1                   | 0   | 0.5   | 0.5       | 0.5  | 0.5   | 0.5   | 0.5  | 0.5  | 0.5   | 0.5   | 0.5   |
| yhiE   | 606  | 1                   | 0   | 0.5   | 0.5       | 0.5  | 0.455 | 0.5   | 0.5  | 0.5  | 0.5   | 0.465 | 0.46  |
| ompT   | 226  | 1                   | 0   | 0.5   | 0.475     | 0.5  | 0.47  | 0.5   | 0.5  | 0.5  | 0.5   | 0.465 | 0.5   |
| yrbL   | 929  | 1                   | 0   | 0.155 | 0.5       | 0.5  | 0.5   | 0.5   | 0.5  | 0.5  | 0.5   | 0.5   | 0.5   |
| ybcU   | 357  | 1                   | 0   | 0.185 | 0.5       | 0.5  | 0.5   | 0.5   | 0.5  | 0.5  | 0.5   | 0.5   | 0.455 |
| pagC   | 1026 | 0.5                 | 0.5 | 0.5   | 0.5       | 0.5  | 0.5   | 0.5   | 0.5  | 0.5  | 0.5   | 0.5   | 0.5   |
| rstA   | 349  | 1                   | 0   | 0.5   | 0.5       | 0.5  | 0.5   | 0.5   | 0.5  | 0.5  | 0.5   | 0.5   | 0.5   |
| ybjX   | 438  | 1                   | 0   | 0.5   | 0.5       | 0.5  | 0.47  | 0.5   | 0.5  | 0.5  | 0.5   | 0.09  | 0.5   |
| udg    | 729  | 1                   | 0   | 0.5   | 0.47      | 0.5  | 0.5   | 0.5   | 0.5  | 0.5  | 0.5   | 0.5   | 0.5   |
| mig-14 | 568  | 1                   | 0   | 0.5   | 0.475     | 0.5  | 0.215 | 0.5   | 0.5  | 0.5  | 0.5   | 0.5   | 0.5   |
| pagC   | 1027 | 1                   | 0   | 0.5   | 0.5       | 0.5  | 0.5   | 0.5   | 0.5  | 0.5  | 0.5   | 0.5   | 0.5   |
| pagD   | 704  | 1                   | 0   | 0.5   | 0.475     | 0.5  | 0.535 | 0.5   | 0.5  | 0.5  | 0.5   | 0.46  | 0.5   |
| rstA   | 330  | 1                   | 0   | 0.5   | 0.5       | 0.5  | 0.5   | 0.5   | 0.5  | 0.5  | 0.5   | 0.5   | 0.5   |
| mgtC   | 623  | 1                   | 0   | 0.5   | 0.5       | 0.5  | 0.5   | 0.5   | 0.5  | 0.5  | 0.5   | 0.195 | 0.5   |
| pmrD   | 513  | 1                   | 0   | 0.5   | 0.5       | 0.5  | 0.47  | 0.5   | 0.5  | 0.5  | 0.5   | 0.17  | 0.5   |
| yrbL   | 943  | 1                   | 0   | 0.5   | 0.5       | 0.5  | 0.46  | 0.5   | 0.5  | 0.12 | 0.5   | 0.5   | 0.205 |
| phoP   | 277  | 1                   | 0   | 0.5   | 0.5       | 0.5  | 0.5   | 0.5   | 0.5  | 0.5  | 0.5   | 0.5   | 0.5   |
| phoP   | 604  | 1                   | 0   | 0.5   | 0.5       | 0.5  | 0.5   | 0.5   | 0.5  | 0.5  | 0.5   | 0.5   | 0.5   |
| mgtA   | 599  | 1                   | 0   | 0.5   | 0.5       | 0.5  | 0.47  | 0.5   | 0.5  | 0.5  | 0.5   | 0.5   | 0.5   |
| mgtA   | 149  | 1                   | 0   | 0.5   | 0.5       | 0.5  | 0.465 | 0.5   | 0.5  | 0.5  | 0.5   | 0.5   | 0.5   |
| pmrD   | 125  | 1                   | 0   | 0.5   | 0.5       | 0.5  | 0.5   | 0.5   | 0.5  | 0.5  | 0.5   | 0.5   | 0.5   |
| yhiW   | 743  | 0                   | 0   | 0.5   | 0.5       | 0.5  | 0.53  | 0.5   | 0.5  | 0.07 | 0.455 | 0.455 | 0.5   |
| yhiW   | 646  | 0.5                 | 0.5 | 0.5   | 0.5       | 0.5  | 0.53  | 0.5   | 0.5  | 0.07 | 0.455 | 0.455 | 0.5   |
| ybjX   | 417  | 1                   | 0   | 0.5   | 0.5       | 0.5  | 0.47  | 0.5   | 0.5  | 0.5  | 0.5   | 0.09  | 0.5   |
| virK   | 642  | 1                   | 0   | 0.5   | 0.5       | 0.5  | 0.46  | 0.5   | 0.5  | 0.5  | 0.5   | 0.455 | 0.5   |
| pagP   | 602  | 0.5                 | 0.5 | 0.5   | 0.5       | 0.5  | 0.455 | 0.5   | 0.5  | 0.5  | 0.5   | 0.135 | 0.5   |
| ybjX   | 402  | 1                   | 0   | 0.5   | 0.5       | 0.5  | 0.47  | 0.5   | 0.5  | 0.5  | 0.5   | 0.09  | 0.5   |
| ugtL   | 883  | 0.5                 | 0.5 | 0.5   | 0.47      | 0.5  | 0.47  | 0.465 | 0.5  | 0.5  | 0.5   | 0.46  | 0.5   |
| slyB   | 352  | 0.5                 | 0.5 | 0.5   | 0.5       | 0.5  | 0.5   | 0.5   | 0.5  | 0.5  | 0.5   | 0.455 | 0.5   |
| nmpC   | 224  | 0                   | 1   | 0.5   | 0.53      | 0.5  | 0.54  | 0.5   | 0.5  | 0.5  | 0.5   | 0.535 | 0.54  |
| hdeA   | 137  | 1                   | 0   | 0.5   | 0.5       | 0.5  | 0.46  | 0.5   | 0.5  | 0.5  | 0.5   | 0.5   | 0.5   |
| hdeD   | 146  | 0.5                 | 0.5 | 0.5   | 0.5       | 0.5  | 0.46  | 0.5   | 0.5  | 0.5  | 0.5   | 0.5   | 0.5   |

| Gene   | Code | Activated/Repressed |     |           | Other TFBS |       |       |      |       |       |      |       |       |
|--------|------|---------------------|-----|-----------|------------|-------|-------|------|-------|-------|------|-------|-------|
|        |      | Activated           |     | Repressed | AraC       | ArcA  | ArgR  | CRP  | CytR  | DeoR  | DnaA | FIS   | FNR   |
|        |      | A1                  | A2  | I1        | I2         | I3    | I4    | I5   | I6    | I7    | I8   | I9    |       |
| hilA   | 822  | 0                   | 1   | 0.155     | 0.5        | 0.5   | 0.465 | 0.5  | 0.5   | 0.5   | 0.5  | 0.54  | 0.5   |
| slyB   | 350  | 1                   | 0   | 0.5       | 0.5        | 0.5   | 0.5   | 0.5  | 0.5   | 0.5   | 0.5  | 0.455 | 0.5   |
| ybjX   | 359  | 1                   | 0   | 0.5       | 0.5        | 0.5   | 0.5   | 0.5  | 0.5   | 0.5   | 0.5  | 0.5   | 0.5   |
| rstA   | 339  | 0.5                 | 0.5 | 0.5       | 0.5        | 0.5   | 0.5   | 0.5  | 0.5   | 0.5   | 0.5  | 0.5   | 0.5   |
| virK   | 643  | 1                   | 0   | 0.5       | 0.5        | 0.5   | 0.46  | 0.5  | 0.5   | 0.5   | 0.5  | 0.455 | 0.5   |
| mgtC   | 681  | 1                   | 0   | 0.5       | 0.5        | 0.5   | 0.5   | 0.5  | 0.5   | 0.5   | 0.5  | 0.195 | 0.5   |
| pipD   | 847  | 0.5                 | 0.5 | 0.5       | 0.5        | 0.5   | 0.5   | 0.5  | 0.5   | 0.5   | 0.5  | 0.5   | 0.5   |
| pgtE   | 720  | 1                   | 0   | 0.5       | 0.5        | 0.5   | 0.455 | 0.5  | 0.5   | 0.5   | 0.5  | 0.185 | 0.5   |
| mgtC   | 925  | 0                   | 1   | 0.5       | 0.5        | 0.5   | 0.5   | 0.5  | 0.5   | 0.5   | 0.5  | 0.195 | 0.5   |
| yeaF   | 469  | 0                   | 1   | 0.5       | 0.5        | 0.5   | 0.54  | 0.5  | 0.5   | 0.5   | 0.5  | 0.465 | 0.5   |
| trs5_8 | 354  | 0.5                 | 0.5 | 0.5       | 0.5        | 0.5   | 0.46  | 0.5  | 0.5   | 0.5   | 0.5  | 0.5   | 0.5   |
| yeaF   | 464  | 0                   | 1   | 0.5       | 0.5        | 0.5   | 0.54  | 0.5  | 0.5   | 0.5   | 0.5  | 0.465 | 0.5   |
| mgtC   | 718  | 1                   | 0   | 0.5       | 0.5        | 0.5   | 0.5   | 0.5  | 0.5   | 0.5   | 0.5  | 0.195 | 0.5   |
| yobG   | 861  | 1                   | 0   | 0.5       | 0.5        | 0.5   | 0.5   | 0.5  | 0.5   | 0.5   | 0.5  | 0.46  | 0.5   |
| yaG    | 753  | 0.5                 | 0.5 | 0.5       | 0.48       | 0.5   | 0.53  | 0.5  | 0.5   | 0.5   | 0.5  | 0.5   | 0.5   |
| ompX   | 242  | 1                   | 0   | 0.5       | 0.5        | 0.5   | 0.455 | 0.5  | 0.5   | 0.5   | 0.5  | 0.455 | 0.545 |
| ompX   | 248  | 0.5                 | 0.5 | 0.5       | 0.5        | 0.165 | 0.465 | 0.5  | 0.5   | 0.5   | 0.5  | 0.46  | 0.545 |
| yhdG   | 546  | 0                   | 0   | 0.5       | 0.52       | 0.5   | 0.545 | 0.54 | 0.825 | 0.5   | 0.5  | 0.95  | 0.5   |
| yaiN   | 356  | 0                   | 0   | 0.5       | 0.5        | 0.5   | 0.5   | 0.5  | 0.5   | 0.5   | 0.5  | 0.5   | 0.5   |
| pyrI   | 286  | 0                   | 0   | 0.5       | 0.5        | 0.5   | 0.5   | 0.5  | 0.5   | 0.5   | 0.5  | 0.5   | 0.5   |
| ygiW   | 512  | 0                   | 0   | 0.5       | 0.5        | 0.5   | 0.5   | 0.5  | 0.5   | 0.5   | 0.5  | 0.5   | 0.5   |
| gadB   | 78   | 0                   | 0   | 0.5       | 0.53       | 0.5   | 0.53  | 0.5  | 0.5   | 0.885 | 0.54 | 0.5   | 0.5   |
| gadA   | 77   | 0                   | 0   | 0.5       | 0.54       | 0.5   | 0.54  | 0.5  | 0.5   | 0.5   | 0.5  | 0.5   | 0.5   |
| dps    | 75   | 0                   | 0   | 0.5       | 0.5        | 0.5   | 0.5   | 0.5  | 0.5   | 0.5   | 0.5  | 0.81  | 0.5   |
| b3100  | 74   | 0                   | 0   | 0.5       | 0.5        | 0.5   | 0.5   | 0.5  | 0.5   | 0.5   | 0.5  | 0.5   | 0.5   |
| yqjE   | 860  | 0                   | 0   | 0.5       | 0.5        | 0.5   | 0.5   | 0.5  | 0.5   | 0.5   | 0.5  | 0.5   | 0.5   |
| no     | 1028 | 1                   | 0   | 0.5       | 0.770      | 0.5   | 0.5   | 0.5  | 0.5   | 0.5   | 0.5  | 0.740 | 0.5   |
| no     | 1029 | 0.5                 | 0.5 | 0.5       | 0.5        | 0.5   | 0.700 | 0.5  | 0.5   | 0.5   | 0.5  | 0.5   | 0.5   |
| no     | 1030 | 1                   | 0   | 0.5       | 0.5        | 0.5   | 0.700 | 0.5  | 0.5   | 0.5   | 0.5  | 0.5   | 0.5   |
| proP   | 1035 | 1                   | 0   | 0.5       | 0.5        | 0.5   | 0.5   | 0.5  | 0.5   | 0.5   | 0.5  | 0.780 | 0.5   |
| hemL   | 1031 | 1                   | 0   | 0.5       | 0.5        | 0.5   | 0.5   | 0.5  | 0.5   | 0.5   | 0.5  | 0.5   | 0.5   |
| hemL   | 1032 | 0.5                 | 0.5 | 0.5       | 0.5        | 0.5   | 0.5   | 0.5  | 0.5   | 0.5   | 0.5  | 0.5   | 0.5   |
| proP   | 1033 | 1                   | 0   | 0.5       | 0.5        | 0.5   | 0.760 | 0.5  | 0.5   | 0.5   | 0.5  | 0.800 | 0.5   |
| proP   | 1034 | 0.5                 | 0.5 | 0.5       | 0.5        | 0.5   | 0.760 | 0.5  | 0.5   | 0.5   | 0.5  | 0.800 | 0.5   |

**Other TFBs**

| Gene   | Code | <i>FruR</i> | <i>Fur</i> | <i>GlpR</i> | <i>IHF</i> | <i>Lrp</i> | <i>MalT</i> | <i>MeiR</i> | <i>NarL</i> | <i>OmpR</i> | <i>OxyR</i> | <i>RcsU</i> | <i>RhaS</i> |
|--------|------|-------------|------------|-------------|------------|------------|-------------|-------------|-------------|-------------|-------------|-------------|-------------|
|        |      | I10         | I11        | I12         | I13        | I14        | I15         | I16         | I17         | I18         | I19         | I20         | I21         |
| b2833  | 73   | 0.5         | 0.5        | 0.5         | 0.5        | 0.455      | 0.5         | 0.5         | 0.5         | 0.5         | 0.5         | 0.5         | 0.5         |
| b1825  | 6    | 0.5         | 0.5        | 0.5         | 0.5        | 0.5        | 0.5         | 0.5         | 0.5         | 0.5         | 0.5         | 0.5         | 0.5         |
| b1826  | 28   | 0.5         | 0.5        | 0.5         | 0.5        | 0.53       | 0.5         | 0.5         | 0.5         | 0.5         | 0.5         | 0.5         | 0.5         |
| nmpC   | 221  | 0.5         | 0.5        | 0.5         | 0.05       | 0.205      | 0.5         | 0.5         | 0.5         | 0.95        | 0.5         | 0.5         | 0.5         |
| slyB   | 351  | 0.5         | 0.5        | 0.5         | 0.455      | 0.215      | 0.5         | 0.5         | 0.5         | 0.5         | 0.5         | 0.5         | 0.5         |
| ompT   | 230  | 0.5         | 0.5        | 0.5         | 0.2        | 0.46       | 0.5         | 0.5         | 0.2         | 0.12        | 0.5         | 0.5         | 0.5         |
| ybjX   | 358  | 0.5         | 0.5        | 0.5         | 0.455      | 0.47       | 0.5         | 0.5         | 0.215       | 0.5         | 0.5         | 0.5         | 0.5         |
| ybjX   | 360  | 0.5         | 0.5        | 0.5         | 0.455      | 0.47       | 0.5         | 0.5         | 0.215       | 0.5         | 0.5         | 0.5         | 0.5         |
| yhiE   | 606  | 0.5         | 0.5        | 0.5         | 0.825      | 0.19       | 0.5         | 0.5         | 0.46        | 0.5         | 0.5         | 0.5         | 0.5         |
| ompT   | 226  | 0.5         | 0.5        | 0.5         | 0.2        | 0.46       | 0.5         | 0.5         | 0.2         | 0.12        | 0.5         | 0.5         | 0.5         |
| yrbL   | 929  | 0.5         | 0.5        | 0.5         | 0.5        | 0.47       | 0.5         | 0.5         | 0.2         | 0.5         | 0.5         | 0.5         | 0.455       |
| ybcU   | 357  | 0.5         | 0.5        | 0.5         | 0.175      | 0.455      | 0.5         | 0.5         | 0.46        | 0.5         | 0.5         | 0.5         | 0.5         |
| pagC   | 1026 | 0.5         | 0.5        | 0.5         | 0.86       | 0.81       | 0.5         | 0.5         | 0.5         | 0.14        | 0.5         | 0.5         | 0.5         |
| rstA   | 349  | 0.5         | 0.5        | 0.5         | 0.5        | 0.46       | 0.5         | 0.5         | 0.5         | 0.5         | 0.5         | 0.5         | 0.5         |
| ybjX   | 438  | 0.5         | 0.5        | 0.5         | 0.5        | 0.455      | 0.5         | 0.5         | 0.5         | 0.5         | 0.5         | 0.5         | 0.5         |
| udg    | 729  | 0.5         | 0.5        | 0.5         | 0.545      | 0.545      | 0.5         | 0.5         | 0.21        | 0.5         | 0.5         | 0.15        | 0.5         |
| mig-14 | 568  | 0.5         | 0.5        | 0.5         | 0.455      | 0.455      | 0.5         | 0.5         | 0.5         | 0.08        | 0.5         | 0.5         | 0.5         |
| pagC   | 1027 | 0.5         | 0.5        | 0.5         | 0.86       | 0.81       | 0.5         | 0.5         | 0.5         | 0.14        | 0.5         | 0.5         | 0.5         |
| pagD   | 704  | 0.5         | 0.5        | 0.5         | 0.205      | 0.46       | 0.5         | 0.5         | 0.185       | 0.5         | 0.5         | 0.5         | 0.5         |
| rstA   | 330  | 0.5         | 0.5        | 0.5         | 0.5        | 0.5        | 0.5         | 0.5         | 0.5         | 0.5         | 0.5         | 0.5         | 0.5         |
| mgtC   | 623  | 0.5         | 0.5        | 0.5         | 0.455      | 0.46       | 0.5         | 0.5         | 0.5         | 0.5         | 0.5         | 0.5         | 0.5         |
| pmrD   | 513  | 0.5         | 0.5        | 0.5         | 0.5        | 0.46       | 0.5         | 0.5         | 0.2         | 0.5         | 0.5         | 0.5         | 0.5         |
| yrbL   | 943  | 0.5         | 0.5        | 0.5         | 0.45       | 0.5        | 0.5         | 0.5         | 0.5         | 0.5         | 0.5         | 0.5         | 0.5         |
| phoP   | 277  | 0.5         | 0.5        | 0.5         | 0.205      | 0.46       | 0.5         | 0.5         | 0.455       | 0.5         | 0.5         | 0.5         | 0.5         |
| phoP   | 604  | 0.5         | 0.5        | 0.5         | 0.455      | 0.455      | 0.5         | 0.5         | 0.5         | 0.5         | 0.5         | 0.5         | 0.5         |
| mgtA   | 599  | 0.5         | 0.5        | 0.5         | 0.46       | 0.545      | 0.5         | 0.815       | 0.5         | 0.5         | 0.5         | 0.5         | 0.5         |
| mgtA   | 149  | 0.5         | 0.5        | 0.5         | 0.455      | 0.455      | 0.82        | 0.5         | 0.5         | 0.5         | 0.5         | 0.5         | 0.5         |
| pmrD   | 125  | 0.5         | 0.5        | 0.5         | 0.46       | 0.46       | 0.5         | 0.5         | 0.455       | 0.5         | 0.5         | 0.5         | 0.5         |
| yhiW   | 743  | 0.5         | 0.5        | 0.5         | 0.17       | 0.545      | 0.5         | 0.5         | 0.46        | 0.5         | 0.5         | 0.5         | 0.5         |
| yhiW   | 646  | 0.5         | 0.5        | 0.5         | 0.17       | 0.545      | 0.5         | 0.5         | 0.46        | 0.5         | 0.5         | 0.5         | 0.5         |
| ybjX   | 417  | 0.5         | 0.5        | 0.5         | 0.5        | 0.455      | 0.5         | 0.5         | 0.5         | 0.5         | 0.5         | 0.5         | 0.5         |
| virK   | 642  | 0.5         | 0.5        | 0.5         | 0.455      | 0.535      | 0.5         | 0.5         | 0.87        | 0.13        | 0.5         | 0.5         | 0.5         |
| pagP   | 602  | 0.5         | 0.5        | 0.5         | 0.145      | 0.145      | 0.5         | 0.5         | 0.175       | 0.5         | 0.5         | 0.5         | 0.5         |
| ybjX   | 402  | 0.5         | 0.5        | 0.5         | 0.5        | 0.455      | 0.5         | 0.5         | 0.5         | 0.5         | 0.5         | 0.5         | 0.5         |
| ugtL   | 883  | 0.5         | 0.5        | 0.45        | 0.455      | 0.46       | 0.5         | 0.5         | 0.455       | 0.5         | 0.5         | 0.5         | 0.5         |
| slyB   | 352  | 0.5         | 0.5        | 0.5         | 0.46       | 0.46       | 0.5         | 0.5         | 0.175       | 0.135       | 0.5         | 0.5         | 0.5         |
| nmpC   | 224  | 0.5         | 0.175      | 0.5         | 0.175      | 0.545      | 0.5         | 0.5         | 0.545       | 0.5         | 0.5         | 0.5         | 0.5         |
| hdeA   | 137  | 0.5         | 0.5        | 0.5         | 0.175      | 0.21       | 0.5         | 0.5         | 0.155       | 0.5         | 0.5         | 0.5         | 0.5         |
| hdeD   | 146  | 0.5         | 0.5        | 0.5         | 0.16       | 0.195      | 0.5         | 0.5         | 0.5         | 0.5         | 0.5         | 0.5         | 0.5         |

**Other TFBs**

| <b>Gene</b> | <b>Code</b> | <b>FruR<br/>I10</b> | <b>Fur<br/>I11</b> | <b>GlpR<br/>I12</b> | <b>IHF<br/>I13</b> | <b>Lrp<br/>I14</b> | <b>MalT<br/>I15</b> | <b>MelR<br/>I16</b> | <b>NarL<br/>I17</b> | <b>OmpR<br/>I18</b> | <b>OxyR<br/>I19</b> | <b>RcsU<br/>I20</b> | <b>RhaS<br/>I21</b> |
|-------------|-------------|---------------------|--------------------|---------------------|--------------------|--------------------|---------------------|---------------------|---------------------|---------------------|---------------------|---------------------|---------------------|
| hilA        | 822         | 0.5                 | 0.5                | 0.5                 | 0.18               | 0.54               | 0.5                 | 0.5                 | 0.19                | 0.5                 | 0.5                 | 0.5                 | 0.5                 |
| slyB        | 350         | 0.5                 | 0.5                | 0.5                 | 0.455              | 0.215              | 0.5                 | 0.5                 | 0.5                 | 0.5                 | 0.5                 | 0.5                 | 0.5                 |
| ybjX        | 359         | 0.5                 | 0.5                | 0.5                 | 0.455              | 0.47               | 0.5                 | 0.5                 | 0.215               | 0.5                 | 0.5                 | 0.5                 | 0.5                 |
| rstA        | 339         | 0.5                 | 0.5                | 0.5                 | 0.5                | 0.5                | 0.5                 | 0.5                 | 0.5                 | 0.5                 | 0.5                 | 0.5                 | 0.5                 |
| virK        | 643         | 0.5                 | 0.5                | 0.5                 | 0.455              | 0.535              | 0.5                 | 0.5                 | 0.87                | 0.13                | 0.5                 | 0.5                 | 0.5                 |
| mgtC        | 681         | 0.5                 | 0.5                | 0.5                 | 0.455              | 0.46               | 0.5                 | 0.5                 | 0.5                 | 0.5                 | 0.5                 | 0.5                 | 0.5                 |
| pipD        | 847         | 0.5                 | 0.5                | 0.5                 | 0.46               | 0.465              | 0.5                 | 0.5                 | 0.455               | 0.5                 | 0.5                 | 0.5                 | 0.5                 |
| pgtE        | 720         | 0.5                 | 0.5                | 0.5                 | 0.455              | 0.46               | 0.5                 | 0.5                 | 0.195               | 0.5                 | 0.5                 | 0.5                 | 0.5                 |
| mgtC        | 925         | 0.5                 | 0.5                | 0.5                 | 0.455              | 0.46               | 0.5                 | 0.5                 | 0.5                 | 0.5                 | 0.5                 | 0.5                 | 0.5                 |
| yeaF        | 469         | 0.5                 | 0.5                | 0.5                 | 0.16               | 0.455              | 0.5                 | 0.5                 | 0.455               | 0.5                 | 0.5                 | 0.5                 | 0.145               |
| trs5_8      | 354         | 0.5                 | 0.5                | 0.5                 | 0.21               | 0.535              | 0.5                 | 0.5                 | 0.5                 | 0.5                 | 0.5                 | 0.5                 | 0.5                 |
| yeaF        | 464         | 0.5                 | 0.5                | 0.5                 | 0.16               | 0.455              | 0.5                 | 0.5                 | 0.455               | 0.5                 | 0.5                 | 0.5                 | 0.145               |
| mgtC        | 718         | 0.5                 | 0.5                | 0.5                 | 0.455              | 0.46               | 0.5                 | 0.5                 | 0.5                 | 0.5                 | 0.5                 | 0.5                 | 0.5                 |
| yobG        | 861         | 0.5                 | 0.5                | 0.5                 | 0.46               | 0.465              | 0.5                 | 0.5                 | 0.5                 | 0.5                 | 0.5                 | 0.5                 | 0.5                 |
| yaG         | 753         | 0.875               | 0.5                | 0.5                 | 0.46               | 0.46               | 0.5                 | 0.5                 | 0.5                 | 0.5                 | 0.5                 | 0.5                 | 0.5                 |
| ompX        | 242         | 0.5                 | 0.5                | 0.5                 | 0.805              | 0.785              | 0.5                 | 0.5                 | 0.46                | 0.87                | 0.5                 | 0.5                 | 0.5                 |
| ompX        | 248         | 0.5                 | 0.5                | 0.5                 | 0.805              | 0.785              | 0.5                 | 0.5                 | 0.455               | 0.85                | 0.5                 | 0.5                 | 0.5                 |
| yhdG        | 546         | 0.5                 | 0.5                | 0.5                 | 0.79               | 0.8                | 0.5                 | 0.5                 | 0.545               | 0.5                 | 0.5                 | 0.5                 | 0.5                 |
| yaiN        | 356         | 0.5                 | 0.5                | 0.5                 | 0.5                | 0.54               | 0.5                 | 0.5                 | 0.545               | 0.5                 | 0.5                 | 0.5                 | 0.5                 |
| pyrI        | 286         | 0.5                 | 0.5                | 0.5                 | 0.5                | 0.5                | 0.5                 | 0.5                 | 0.5                 | 0.5                 | 0.5                 | 0.5                 | 0.5                 |
| ygiW        | 512         | 0.5                 | 0.5                | 0.545               | 0.545              | 0.545              | 0.5                 | 0.5                 | 0.5                 | 0.85                | 0.5                 | 0.5                 | 0.5                 |
| gadB        | 78          | 0.5                 | 0.5                | 0.5                 | 0.8                | 0.815              | 0.5                 | 0.5                 | 0.5                 | 0.9                 | 0.5                 | 0.5                 | 0.5                 |
| gadA        | 77          | 0.5                 | 0.5                | 0.5                 | 0.875              | 0.825              | 0.5                 | 0.5                 | 0.5                 | 0.5                 | 0.5                 | 0.5                 | 0.5                 |
| dps         | 75          | 0.5                 | 0.5                | 0.5                 | 0.95               | 0.535              | 0.5                 | 0.5                 | 0.545               | 0.5                 | 0.95                | 0.5                 | 0.5                 |
| b3100       | 74          | 0.5                 | 0.5                | 0.5                 | 0.5                | 0.5                | 0.5                 | 0.5                 | 0.5                 | 0.5                 | 0.5                 | 0.5                 | 0.5                 |
| yqjE        | 860         | 0.5                 | 0.5                | 0.5                 | 0.5                | 0.5                | 0.5                 | 0.5                 | 0.5                 | 0.5                 | 0.5                 | 0.5                 | 0.5                 |
| no          | 1028        | 0.5                 | 0.890              | 0.5                 | 0.5                | 0.790              | 0.5                 | 0.5                 | 0.710               | 0.5                 | 0.5                 | 0.5                 | 0.5                 |
| no          | 1029        | 0.5                 | 0.5                | 0.5                 | 0.5                | 0.5                | 0.5                 | 0.5                 | 0.5                 | 0.5                 | 0.5                 | 0.5                 | 0.5                 |
| no          | 1030        | 0.5                 | 0.5                | 0.5                 | 0.5                | 0.5                | 0.5                 | 0.5                 | 0.5                 | 0.5                 | 0.5                 | 0.5                 | 0.5                 |
| proP        | 1035        | 0.5                 | 0.5                | 0.5                 | 0.5                | 0.670              | 0.5                 | 0.5                 | 0.5                 | 0.5                 | 0.5                 | 0.5                 | 0.5                 |
| hemL        | 1031        | 0.5                 | 0.5                | 0.5                 | 0.5                | 0.500              | 0.5                 | 0.5                 | 0.5                 | 0.5                 | 0.5                 | 0.5                 | 0.5                 |
| hemL        | 1032        | 0.5                 | 0.5                | 0.5                 | 0.5                | 0.500              | 0.5                 | 0.5                 | 0.5                 | 0.5                 | 0.5                 | 0.5                 | 0.5                 |
| proP        | 1033        | 0.5                 | 0.5                | 0.5                 | 0.5                | 0.670              | 0.5                 | 0.5                 | 0.5                 | 0.5                 | 0.5                 | 0.5                 | 0.5                 |
| proP        | 1034        | 0.5                 | 0.5                | 0.5                 | 0.5                | 0.670              | 0.5                 | 0.5                 | 0.5                 | 0.5                 | 0.5                 | 0.5                 | 0.5                 |

**Other TFBs**

| Gene   | Code | YgiX | PmrA  | SlyA  |
|--------|------|------|-------|-------|
|        |      | I22  | I23   | I24   |
| b2833  | 73   | 0.5  | 0.5   | 0.5   |
| b1825  | 6    | 0.5  | 0.5   | 0.5   |
| b1826  | 28   | 0.5  | 0.5   | 0.44  |
| nmpC   | 221  | 0.5  | 0.5   | 0.21  |
| slyB   | 351  | 0.5  | 0.5   | 0.5   |
| ompT   | 230  | 0.5  | 0.5   | 0.4   |
| ybjX   | 358  | 0.5  | 0.5   | 0.5   |
| ybjX   | 360  | 0.5  | 0.5   | 0.5   |
| yhiE   | 606  | 0.5  | 0.165 | 0.133 |
| ompT   | 226  | 0.5  | 0.5   | 0.4   |
| yrbL   | 929  | 0    | 0.5   | 0.5   |
| ybcU   | 357  | 0.5  | 0.5   | 0.5   |
| pagC   | 1026 | 0.5  | 0.5   | 0.88  |
| rstA   | 349  | 0.5  | 0.5   | 0.5   |
| ybjX   | 438  | 0.5  | 0.5   | 0.5   |
| udg    | 729  | 0    | 0.5   | 0.5   |
| mig-14 | 568  | 0.5  | 0.5   | 0.78  |
| pagC   | 1027 | 0.5  | 0.5   | 0.88  |
| pagD   | 704  | 0.5  | 0.5   | 0.88  |
| rstA   | 330  | 0.5  | 0.5   | 0.5   |
| mgtC   | 623  | 0.5  | 0.5   | 0.7   |
| pmrD   | 513  | 0    | 0.5   | 0.5   |
| yrbL   | 943  | 0    | 0.5   | 0.5   |
| phoP   | 277  | 0.5  | 0.5   | 0.5   |
| phoP   | 604  | 0.5  | 0.5   | 0.5   |
| mgtA   | 599  | 0.5  | 0.5   | 0.5   |
| mgtA   | 149  | 0.5  | 0.5   | 0.5   |
| pmrD   | 125  | 0.5  | 0.5   | 0.5   |
| yhiW   | 743  | 0.5  | 0.5   | 0.5   |
| yhiW   | 646  | 0.5  | 0.5   | 0.5   |
| ybjX   | 417  | 0.5  | 0.5   | 0.5   |
| virK   | 642  | 0.5  | 0.5   | 0.7   |
| pagP   | 602  | 0.5  | 0.5   | 0.5   |
| ybjX   | 402  | 0.5  | 0.5   | 0.5   |
| ugtL   | 883  | 0.5  | 0.5   | 0.86  |
| slyB   | 352  | 0.5  | 0.5   | 0.5   |
| nmpC   | 224  | 0.5  | 0.5   | 0.24  |
| hdeA   | 137  | 0.5  | 0.17  | 0.5   |
| hdeD   | 146  | 0.5  | 0.1   | 0.5   |

**Other TFBs**

| Gene   | Code | Other TFBs  |             |             |
|--------|------|-------------|-------------|-------------|
|        |      | YgiX<br>I22 | PmrA<br>I23 | SlyA<br>I24 |
| hilA   | 822  | 0.5         | 0.5         | 0.3         |
| slyB   | 350  | 0.5         | 0.5         | 0.5         |
| ybjX   | 359  | 0.5         | 0.5         | 0.5         |
| rstA   | 339  | 0.5         | 0.5         | 0.5         |
| virK   | 643  | 0.5         | 0.5         | 0.59        |
| mgtC   | 681  | 0.5         | 0.5         | 0.3         |
| pipD   | 847  | 0.5         | 0.5         | 0.4         |
| pgtE   | 720  | 0.5         | 0.5         | 0.69        |
| mgtC   | 925  | 0.5         | 0.5         | 0.7         |
| yeaF   | 469  | 0           | 0.5         | 0.5         |
| trs5_8 | 354  | 0           | 0.5         | 0.4         |
| yeaF   | 464  | 0           | 0.5         | 0.5         |
| mgtC   | 718  | 0.5         | 0.5         | 0.3         |
| yobG   | 861  | 0.5         | 0.5         | 0.5         |
| yaG    | 753  | 0.5         | 0.5         | 0.5         |
| ompX   | 242  | 0.5         | 0.5         | 0.5         |
| ompX   | 248  | 0.5         | 0.5         | 0.5         |
| yhdG   | 546  | 0.5         | 0.5         | 0.4         |
| yaiN   | 356  | 0.5         | 0.5         | 0.5         |
| pyrI   | 286  | 0.5         | 0.5         | 0.5         |
| ygiW   | 512  | 1           | 0.5         | 0.5         |
| gadB   | 78   | 0.5         | 0.99        | 0.5         |
| gadA   | 77   | 0.5         | 0.99        | 0.4         |
| dps    | 75   | 0.5         | 0.5         | 0.5         |
| b3100  | 74   | 0.5         | 0.5         | 0.5         |
| yqjE   | 860  | 0.5         | 0.5         | 0.5         |
| no     | 1028 | 0.5         | 0.78        | 0.710       |
| no     | 1029 | 0.5         | 0.5         | 0.5         |
| no     | 1030 | 0.5         | 0.5         | 0.5         |
| proP   | 1035 | 0.5         | 0.5         | 0.5         |
| hemL   | 1031 | 0.5         | 0.5         | 0.4         |
| hemL   | 1032 | 0.5         | 0.5         | 0.4         |
| proP   | 1033 | 0.5         | 0.5         | 0.5         |
| proP   | 1034 | 0.5         | 0.5         | 0.5         |

| <b>Table S2: Bacterial strains and plasmids used in this study</b> |                                                                                                                                         |                       |
|--------------------------------------------------------------------|-----------------------------------------------------------------------------------------------------------------------------------------|-----------------------|
| <b>Strain or plasmid</b>                                           | <b>Description</b>                                                                                                                      | <b>Ref. or source</b> |
| <i>S. enterica</i> serovar Typhimurium                             |                                                                                                                                         |                       |
| 14028s                                                             | wild-type                                                                                                                               | (20)                  |
| <i>E. coli</i>                                                     |                                                                                                                                         |                       |
| DH5 $\alpha$                                                       | F <sup>-</sup> <i>supE44</i> $\Delta$ <i>lacU169</i> ( $\phi$ 80 <i>lacZ</i> $\Delta$ M15) <i>hsdR17 recA1 endA1 gyrA96 thi-1 relA1</i> | (21)                  |
| Plasmids                                                           |                                                                                                                                         |                       |
| pMS201                                                             | pSC101ori Km <sup>R</sup> , promoterless GFP <i>mut2</i> vector                                                                         | (22)                  |
| pSGF101                                                            | pSC101ori Km <sup>R</sup> , P <i>phoP</i> -GFP <i>mut2</i>                                                                              | This work             |
| pSGF102                                                            | pSC101ori Km <sup>R</sup> , P <i>pmrD</i> -GFP <i>mut2</i>                                                                              | This work             |
| pSGF103                                                            | pSC101ori Km <sup>R</sup> , P <i>slyB</i> -GFP <i>mut2</i>                                                                              | This work             |
| pSGF106                                                            | pSC101ori Km <sup>R</sup> , P <i>ugtL</i> -GFP <i>mut2</i>                                                                              | This work             |
| pSGF107                                                            | pSC101ori Km <sup>R</sup> , P <i>pagC</i> -GFP <i>mut2</i>                                                                              | This work             |
| pSGF109                                                            | pSC101ori Km <sup>R</sup> , P <i>pagK</i> -GFP <i>mut2</i>                                                                              | This work             |
| pSGF111                                                            | pSC101ori Km <sup>R</sup> , P <i>yobG</i> -GFP <i>mut2</i>                                                                              | This work             |
| pSGF112                                                            | pSC101ori Km <sup>R</sup> , P <i>ugd</i> -GFP <i>mut2</i>                                                                               | This work             |

| <b>Table S3: Primers used to construct the promoters in GFP reporter plasmids</b> |                  |                                         |
|-----------------------------------------------------------------------------------|------------------|-----------------------------------------|
| <b>Primers</b>                                                                    | <b>Promoters</b> | <b>Sequences</b>                        |
| 4811                                                                              | <i>phoP</i>      | 5' CCGCTCGAGAAGAGTTGACCCGTGGCAAGCGTG 3' |
| 4700                                                                              | <i>phoP</i>      | 5' CGGGATCCGTGGCGTAATAATGCATTATCCTC 3'  |
| 4740                                                                              | <i>pmrD</i>      | 5' TTAGGGATCCGCCGCTATCGCACAGCAC 3'      |
| 4741                                                                              | <i>pmrD</i>      | 5' AAGATCTCGAGTTTGGTCATCGTCCCGTTG 3'    |
| 5611                                                                              | <i>yobG</i>      | 5' CGGGATCCAACAGGCATACTACCACCACGATG 3'  |
| 5612                                                                              | <i>yobG</i>      | 5' CGGCTCGAGATGCCATAGCCGCTCATCAGCAG 3'  |
| 4742                                                                              | <i>slyB</i>      | 5' TCGGATCCGGTATAAACATCACCCGAAAG 3'     |
| 4743                                                                              | <i>slyB</i>      | 5' CGGCTCGAGTTCATACCTCTTCTTTAAGC 3'     |
| 4805                                                                              | <i>pagC</i>      | 5' CGGGATCCGTTAGTATCGGCCTGTGCAAC 3'     |
| 4806                                                                              | <i>pagC</i>      | 5' CCGCTCGAGGTTTACTACCAAATCGTAG 3'      |
| 5227                                                                              | <i>pagK</i>      | 5' CGGGATCCTGAAGATGGTAATATTAACC 3'      |
| 5228                                                                              | <i>pagK</i>      | 5' CGGCTCGAGAACAGCAGAAGAGTTGTTATG 3'    |
| 4885                                                                              | <i>ugtL</i>      | 5' CGGGATCCTGACTGCAAAATGCCCCAGGATGC 3'  |
| 4886                                                                              | <i>ugtL</i>      | 5' CCGCTCGAGTCAAATCGACCCGTAGCTTTAGTC 3' |
| 4883                                                                              | <i>ugd</i>       | 5' CGGGATCCGCAATAAGCAAACCATTAGACAAGC 3' |
| 4884                                                                              | <i>ugd</i>       | 5' CCGCTCGAGTGCCGACATTCTCTGCGGCAGTG 3'  |
